# Supplementary material
Source: PubMed Central journal article supplement (PMC4060938)
Supplement: ml400493f_si_001.pdf [file ml400493f_si_001.pdf]

## Supporting Information

### Synthesis of Water-soluble Dinuclear Mn-porphyrin with Multiple Antioxidative Activities

Riku Kubota,<sup>†</sup> Shinya Imamura,<sup>†</sup> Takahiko Shimizu,<sup>§</sup> Shoichiro Asayama<sup>†</sup> and  
Hiroyoshi Kawakami<sup>\*†</sup>  
E-mail: kawakami-hiroyoshi@tmu.ac.jp

<sup>†</sup>*Department of Applied Chemistry, Tokyo Metropolitan University, Minami-Osawa 1-1,  
Hachioji, Tokyo 192-0397, Japan.*

<sup>§</sup>*Department of Advanced Aging Medicine, Chiba University Graduate School of Medicine,  
1-8-1 Inohana, Chuo-ku, Chiba 260-8670, Japan.*

## Experimental section

### Chemicals

*m*-xylylene dibromide was purchased from Sigma-Aldrich Japan. N,N-dimethylformamide (DMF), anhydrous dimethylsulfoxide (DMSO), Mn acetate tetrahydrate  $\text{Mn}(\text{OAc})_2 \cdot 4\text{H}_2\text{O}$  and hydrogen peroxide ( $\text{H}_2\text{O}_2$ , 35 %) were purchased from Kanto Chemical Co., Inc. *m*-chloroperoxybenzoic acid (*m*-CPBA) was purchased from Tokyo Chemical Industry Co., Ltd. Anion exchange resin, Amberlite IRA-401B was purchased from ORGANO corp. IRA-401B was washed successively with 1M HCL and methanol before use.

### Synthesis of $\text{MnM4PyP}_3\text{P}$

5-(4-pyridyl)-10,15,20-triphenyl-21*H*,23*H*-porphyrin ( $\text{H}_2\text{PyP}_3\text{P}$ ) was synthesized according to our previous procedure,<sup>1</sup> which was modified for  $\text{H}_2\text{PyP}_3\text{P}$ .  $\text{H}_2\text{PyP}_3\text{P}$  (50mg, 0.081 mmol) and methyl iodide (0.5mL, 8 mmol) in  $\text{CHCl}_3$  (5 mL) was refluxed for 6 hours in 10 mL recovery flask equipped with reflux condenser. The reaction mixture was sampled and monitored by TLC (silica gel  $\text{CHCl}_3/\text{MeOH}=4/1$ , v/v) at hourly interval. Methyl iodide (0.5 mL, 8 mmol) was added after every sampling. After cooling the reaction mixture, ether (5 mL) was added to it. Purple solids were collected by suction filtration, washed with ether successively, and dried *in vacuo* to give  $\text{H}_2\text{M4PyP}_3\text{P}$  as a purple solid. 46mg, 75%. <sup>1</sup>H-NMR (DMSO- $d_6$ ):  $\delta$  9.44 (d, 2H, J=6.5 Hz, py-2,6), 9.02 (d, 2H, J=6.5 Hz, py-3,5), 8.98 (br d, 2H, pyrrole- $\beta$ ), 8.95 (br d, 2H, pyrrole- $\beta$ ), 8.87 (br d, 4H, pyrrole- $\beta$ ), 8.24 (d, 6H, J=6.7 Hz, Ph), 7.91-7.84 (m, 9H, Ph), 4.70 (s, 3H, Me), -2.91 (s, 2H, inner proton).

$\text{H}_2\text{M4PyP}_3\text{P}$  and  $\text{Mn}(\text{OAc})_2 \cdot 4\text{H}_2\text{O}$  dissolved in  $\text{CHCl}_3/\text{MeOH}$  mixed solvent ( $\text{CHCl}_3/\text{MeOH}=2/1$ , v/v) and refluxed and monitored by UV/vis spectrophotometer. The Soret band of  $\text{MnM4PyP}_3\text{P}$  at 464 nm was raised through the reaction while that of  $\text{H}_2\text{M4PyP}_3\text{P}$  at 421 nm was fallen. The reaction was continued until no spectral change was observed. After the reaction was finished, the solvent was evaporated *in vacuo*. The resulting solid was dissolved in water and subsequently precipitated as  $\text{PF}_6^-$  salt with ammonium hexafluorophosphate ( $\text{NH}_4\text{PF}_6$ ), and then collected by suction filtration. The  $\text{PF}_6^-$  salt was dissolved in methanol and subjected to ion exchange resin, Amberlite IRA-401B (Cl<sup>-</sup> form). The resulting fraction was concentrated to give greenish solid. Elemental analysis:  $\text{MnM4PyP}_3\text{P} \cdot \text{CH}_3\text{OH}$  ( $\text{C}_{45}\text{H}_{34}\text{N}_5\text{MnCl}_2$ ), Anal (%): C:68.71, H:4.36, N:8.91. Found (%): C:68.46, H:4.61, N:8.55. UV/vis (50mM pH 7.4 phosphate buffer)  $\lambda_{\text{max}}(\epsilon)$ : 380(41000), 402(43000), 467(84100), 566(10100), 599(7300).

### Synthesis of MnPD

$\text{H}_2\text{PyP}_3\text{P}$  (600mg, 0.976mmol) and *m*-xylylene dibromide (118mg 0.447mmol) were

dissolved in degassed DMF and stirred at 100°C for 21 hours under N<sub>2</sub>. After the reaction, the solvent was evaporated *in vacuo*. The resulting solid was subjected to chromatography on alumina gel eluted by CHCl<sub>3</sub> to remove unreacted H<sub>2</sub>PyP<sub>3</sub>P, and then eluted by CHCl<sub>3</sub>/MeOH/DMF mixed solvent (CHCl<sub>3</sub>/MeOH=4:1, DMF was added a few drops per 10-mL mixed solvent) to collect other bands. The collected fractions were combined and re-chromatographed on alumina gel eluted by CHCl<sub>3</sub>/MeOH(9/1) to give H<sub>2</sub>PD as a purple solid (293mg, 69%). <sup>1</sup>H NMR (DMSO-d<sub>6</sub>) δ9.72(d, 4H, J=4.6 Hz py-2,6), 9.13(d, 4H, J=4.6 Hz py-3,5), 8.94(s, 4H, pyrrole-β), 8.79(s, 4H, pyrrole-β), 8.54(s, 8H, pyrrole-β), 8.33(s, 1H, xylyl-2), 8.22(d, 4H, Ph<sub>trans</sub> to pyridyl -2,6), 8.09(d, 2H, xylyl-4,6), 7.91~7.85(m, 7H, xylyl-5 & Ph<sub>trans</sub> to pyridyl-3,4,5), 7.62~7.56(m, 12H, Ph<sub>cis</sub> to pyridyl-2,4,6) 7.37~7.35(m, 8H, Ph<sub>cis</sub> to pyridyl-3,5), 6.40(s, 4H, benzyl), -2.96(s, 4H, inner proton).

H<sub>2</sub>PD and Mn(OAc)<sub>2</sub>·4H<sub>2</sub>O in degassed methanol was refluxed and monitored by UV/vis spectrophotometer. The Soret band of MnPD at 467 nm was raised through the reaction while that of H<sub>2</sub>PD at 415 nm was fallen. The reaction was continued until no spectral change was observed. After the reaction was finished, the solvent was evaporated *in vacuo*. The resulting solid was dissolved in water and subsequently precipitated as PF<sub>6</sub><sup>-</sup> salt with ammonium hexafluorophosphate (NH<sub>4</sub>PF<sub>6</sub>), and then collected by suction filtration. The PF<sub>6</sub><sup>-</sup> salt was dissolved in methanol and subjected to ion exchange resin, Amberlite IRA-401B (Cl<sup>-</sup> form). The resulting fraction was concentrated to give greenish solid. Elemental Analysis: MnPD·5.5CH<sub>3</sub>COOH (C<sub>105</sub>H<sub>84</sub>O<sub>11</sub>N<sub>10</sub>Mn<sub>2</sub>Cl<sub>4</sub>), Anal (%):C:65.48, H 4.42, N 7.31. Found (%): 65.43, H 4.59, N 7.32. UV/vis (50mM pH 7.4 phosphate buffer) λ<sub>max</sub>(ε): 379(46800), 401(48800), 467(104200),566(12800),601(9600).

### Measurement of catalase activity

Catalase activity was measured by monitoring O<sub>2</sub> concentration with Clark-type oxygen electrode. To 900μL of Mn-porphyrin in 50mM pH 7.4 phosphate buffer (1~20μM), was added a 100μL of 10mM H<sub>2</sub>O<sub>2</sub> in Milli-Q water. The monitoring was started after the addition of the H<sub>2</sub>O<sub>2</sub> solution. Observed rate constant (k<sub>obs</sub>) at each concentration of Mn-porphyrin was determined as a rate of O<sub>2</sub> production in initial 5 seconds. Catalase activity (k<sub>CAT</sub>) was determined from the slope of the plot of k<sub>obs</sub> as a function of the Mn-porphyrin concentration.

### *In vivo* antioxidative activity

*In vivo* antioxidative activity of Mn-porphyrin derivatives was examined with skeletal muscle-specific SOD deficient (HSA-*Sod2*<sup>-/-</sup>) mice. This mouse exhibits short running time on treadmill due to severe oxidative stress in skeletal muscle. First, running time of the mouse

was recorded on treadmill. After 24 hours, Mn-porphyrin derivatives (MnPD and MnM<sub>4</sub>Py<sub>4</sub>P) dissolved in PBS were intraperitoneally injected (36 mg/kg) in the mice. The running time of the mouse was recorded another 8 and 24 hours after the injection. The antioxidative activity of Mn-porphyrin derivatives was evaluated from the retrieval of the running time.<sup>2</sup>

**$^1\text{H}$  NMR spectrum**

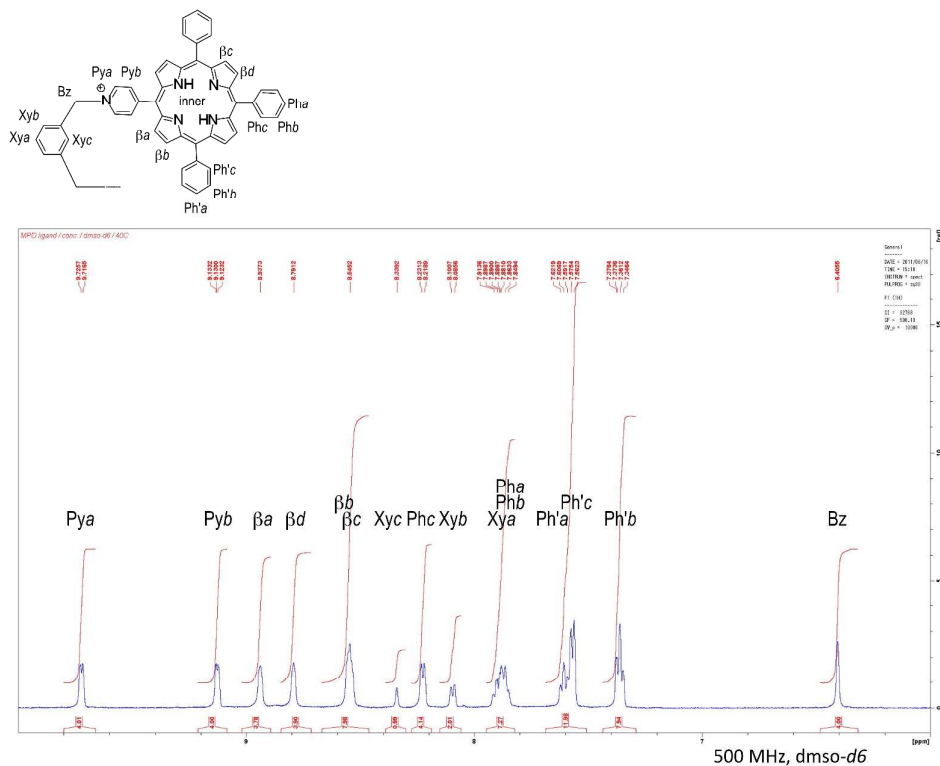

**Figure S1.**  $^1\text{H}$  NMR spectrum of  $\text{H}_2\text{PD}$  in  $\text{DMSO-d}_6$  (500 MHz).

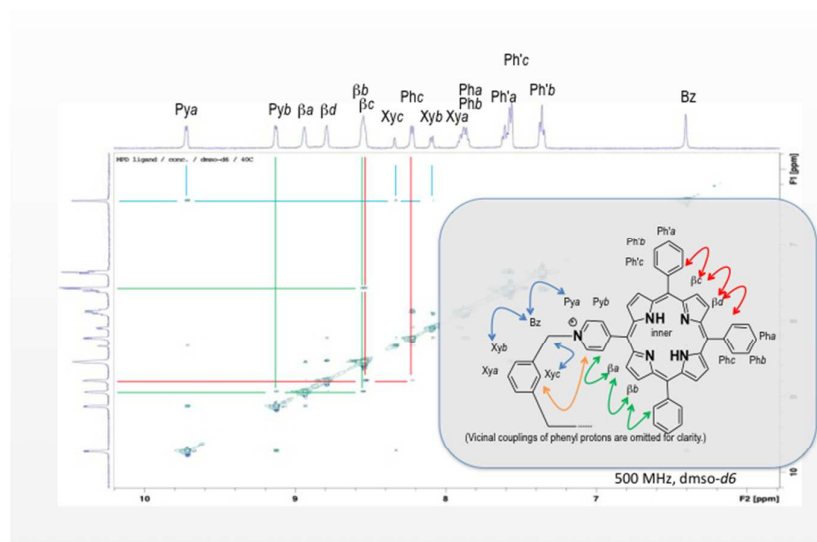

**Figure S2.** NOESY spectrum of  $\text{H}_2\text{PD}$  in  $\text{DMSO-d}_6$  (500 MHz).

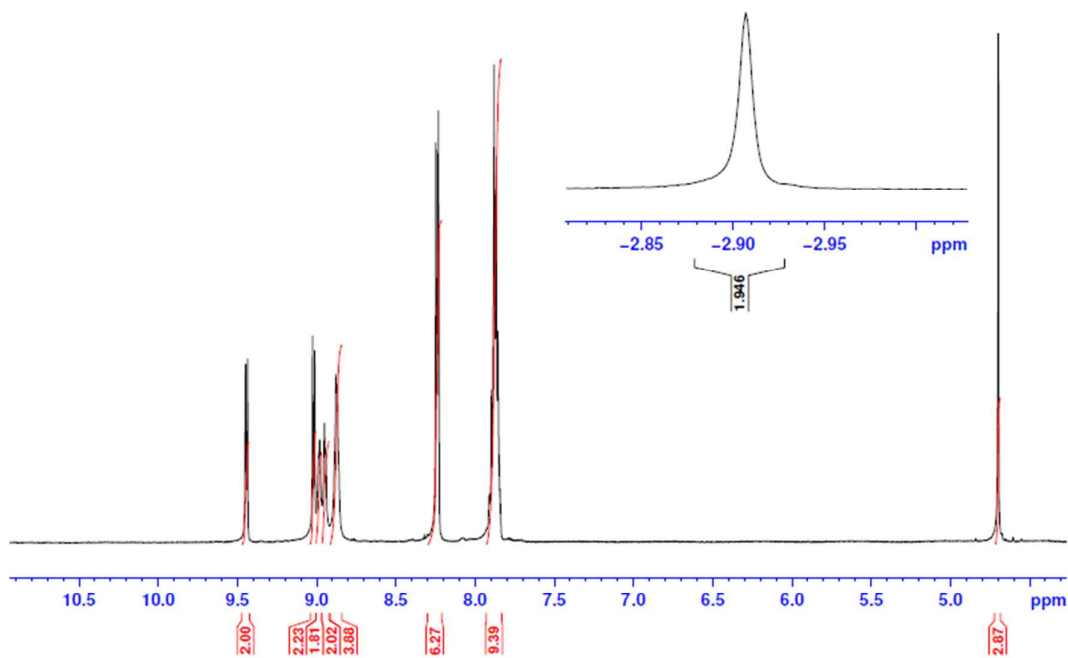

**Figure S3.**  $^1\text{H}$  NMR spectrum of  $\text{H}_2\text{M4Py}_3\text{P}$  in  $\text{DMSO-d}_6$  (500 MHz). Inset: inner proton (2H).

### SOD activity

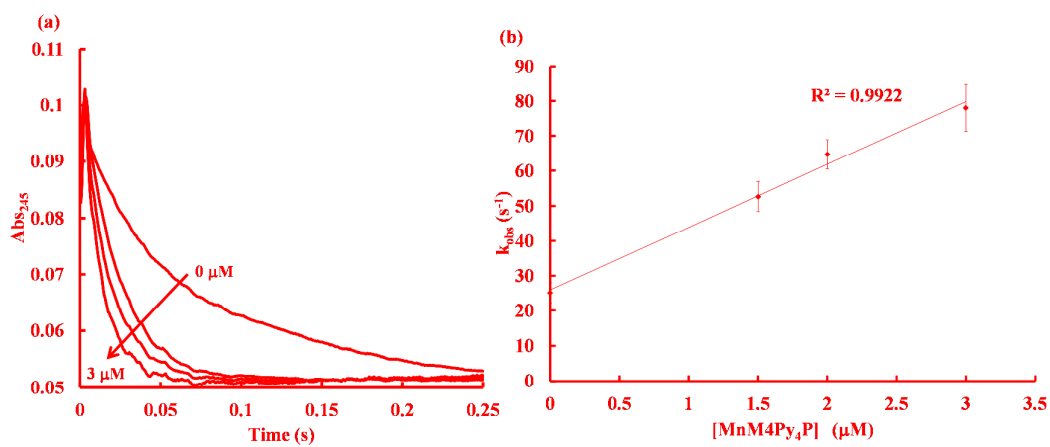

**Figure S4.** (a) Time decay of superoxide in the presence of  $\text{MnM4Py}_4\text{P}$ . (b) Plot of  $k_{\text{obs}}$  as a function of  $\text{MnM4Py}_4\text{P}$  concentration.  $k_{\text{obs}}$  was calculated from the decay of superoxide in initial five milliseconds.

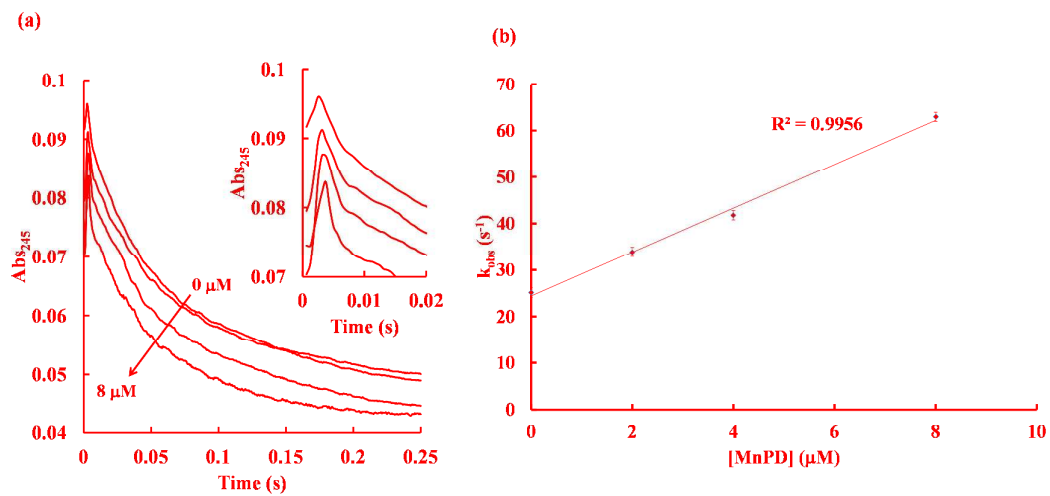

**Figure S5.** (a) Time decay of superoxide in the presence of MnPD. Inset: Zoom in initial 20 milliseconds. (b) Plot of  $k_{\text{obs}}$  as a function of MnPD concentration.  $k_{\text{obs}}$  was calculated from the decay of superoxide in initial milliseconds.

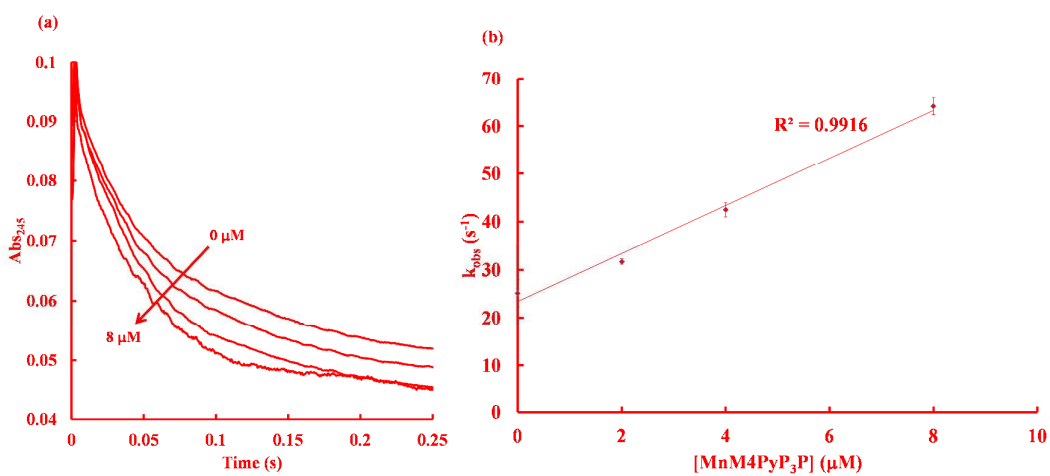

**Figure S6.** (a) Time decay of superoxide in the presence of MnM4PyP<sub>3</sub>P. (b) Plot of  $k_{\text{obs}}$  as a function of MnM4PyP<sub>3</sub>P concentration.  $k_{\text{obs}}$  was calculated from the decay of superoxide in initial five milliseconds.

UV/vis spectra

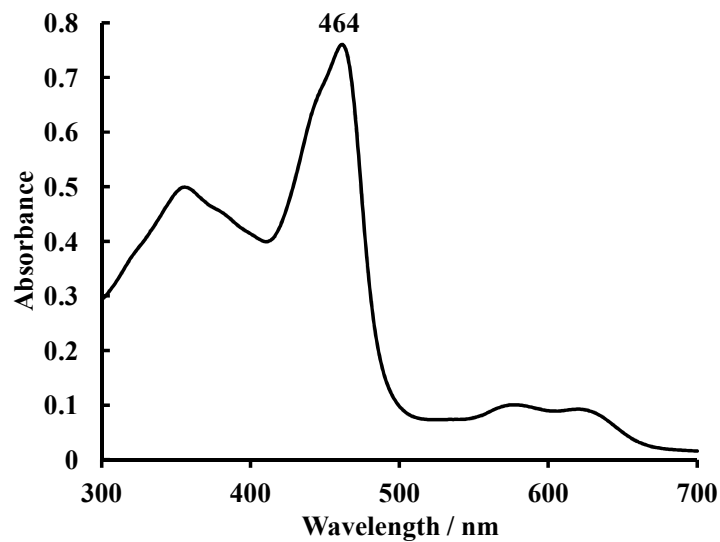

**Figure S7.** Ground-state UV/vis spectrum of 12  $\mu\text{M}$  MnPD in 50 mM borate buffer (pH 9.4).  $\lambda_{\text{max}}(\epsilon)$ : 357(39200), 464(63800), 571(7540).

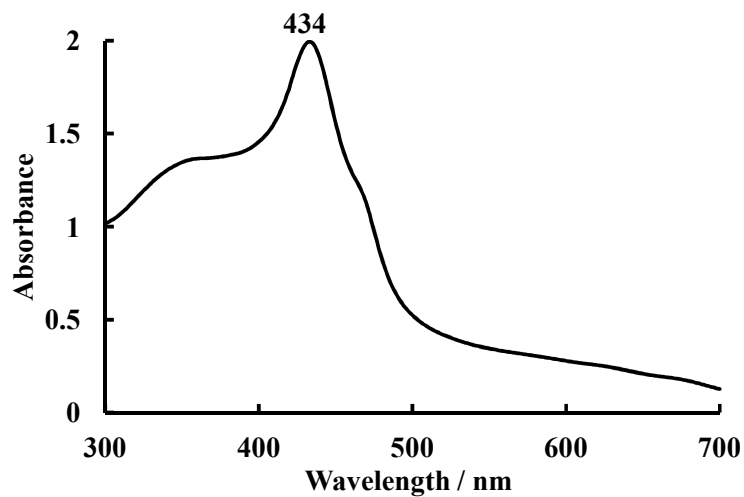

**Figure S8.** UV/vis spectrum of 30  $\mu\text{M}$  MnPD in 50 mM borate buffer (pH 9.4) in the presence of 1 mM H<sub>2</sub>O<sub>2</sub>. The spectrum was rapidly measured after the mixing of H<sub>2</sub>O<sub>2</sub>.



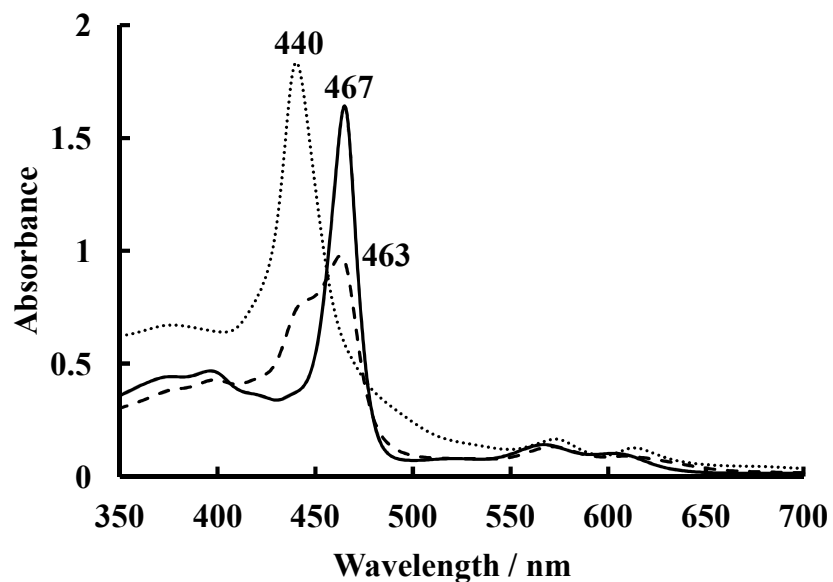

**Figure S9.** UV/vis spectra of  $\text{Mn}^{\text{III}}(\text{OH}_2)\text{PD}$  (solid line),  $\text{Mn}^{\text{IV}}(=\text{O})(\text{OH})\text{PD}$  (dashed line) and  $\text{Mn}^{\text{V}}(=\text{O})(\text{OH})\text{PD}$  (dotted line). MnPD was oxidized by *m*-chloroperbenzoic acid (*m*-CPBA) to form the high-valent oxo-Mn species. The spectra were measured in DMSO- $\text{CH}_2\text{Cl}_2$  mixed solvent (1:1, v/v).

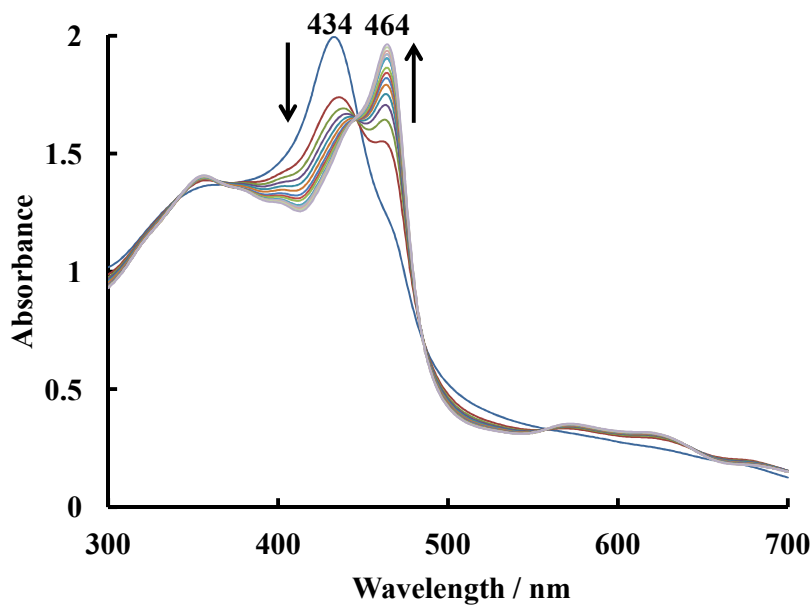

**Figure S10.** Time-course of UV/vis spectral changes of  $30\mu\text{M}$  MnPD in 50 mM borate buffer (pH 9.4) in the presence of 1mM  $\text{H}_2\text{O}_2$ . The spectra were measured for 70 minutes at 5 minute intervals.

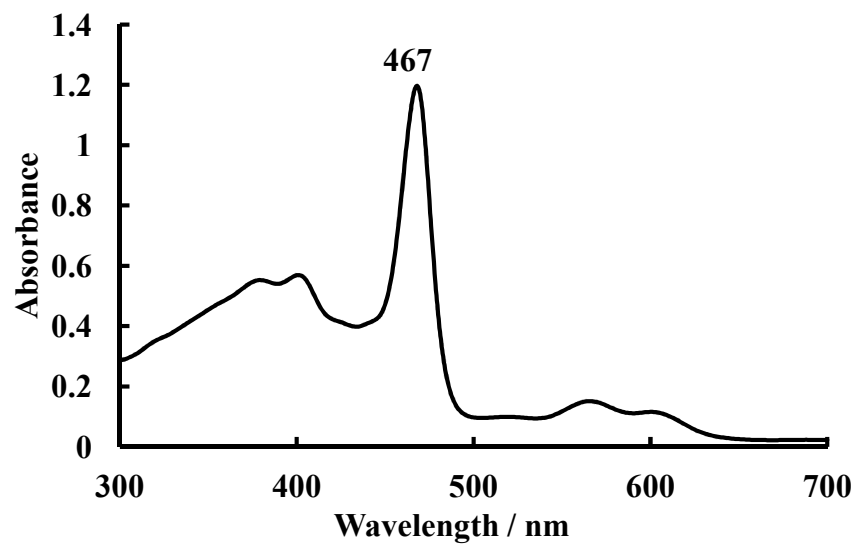

**Figure S11.** Ground-state UV/vis spectrum of 12µM MnPD in 50mM phosphate buffer (pH 7.4).

#### References

- 1 T. Haruyama, S. Asayama, H. Kawakami. Highly Amphiphilic Manganese Porphyrin for Mitochondrial Targeting Antioxidant. *J. Biochem.* **2010**, 147, 153~156.
- 2 H. Kuwahara, T. Horie, S. Ishikawa, C. Tsuda, S. Kawakami, Y. Noda, T. Kaneko, S. Tahara, T. Tachibana, M. Okabe, J. Melki, R. Takano, T. Toda, D. Morikawa, H. Nojiri, H. Kurosawa, T. Shirasawa, T. Shimizu. Oxidative stress in skeletal muscle causes severe disturbance of exercise activity without muscle atrophy. *Free Radical Biol. Med.* **2010**, 48, 1252~1262.
